# Supplementary material for: Early Life Factors and Polycystic Ovary Syndrome in a Swedish Birth Cohort
Source: MDPI journal article supplement (doi:10.3390/ijerph20227083), 2023-11-20

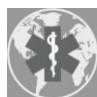

**Table S1.** Representation of modelling strategy

| Full sample: 1973-1995                     |         |         |         |         |  |         |
|--------------------------------------------|---------|---------|---------|---------|--|---------|
|                                            | Model 1 | Model 2 | Model 3 | Model 4 |  | Model 5 |
| Intergenerational sociodemographic factors | MA      | Group   | X       | X       |  | X       |
| Intergenerational biological variables     | MA      | Group   | X       | X       |  | X       |
| Early-life factors: outcomes               | MA      | Group   |         | X       |  | X       |
| Individual adult life factors              | MA      | Group   |         |         |  | X       |

  

| Restricted sample: 1982-1995               |         |         |         |          |          |         |
|--------------------------------------------|---------|---------|---------|----------|----------|---------|
|                                            | Model 1 | Model 2 | Model 3 | Model 4a | Model 4b | Model 5 |
| Intergenerational sociodemographic factors | MA      | Group   | X       | X        | X        | X       |
| Intergenerational biological variables     | MA      | Group   | X       | X        | X        | X       |
| Early-life factors: before birth           | MA      | Group   |         | X        | X        | X       |
| Early-life factors: outcomes               | MA      | Group   |         |          | X        | X       |
| Individual adult life factors              | MA      | Group   |         |          |          | X       |

Abbreviations: MA, minimally adjusted

**Table S2.** Associations of social and biological characteristics with rate of polycystic ovary syndrome among Swedish women born between 1973-1995

|                                            | Model 1         | Model 1         | Model 2         | Model 2         | Model 3         | Model 3         | Model 4         | Model 4a        | Model 4b        | Model 5         | Model 5         |
|--------------------------------------------|-----------------|-----------------|-----------------|-----------------|-----------------|-----------------|-----------------|-----------------|-----------------|-----------------|-----------------|
|                                            | [Full]          | [Res.]          | [Full]          | [Res.]          | [Full]          | [Res.]          | [Full]          | [Res.]          | [Res.]          | [Full]          | [Res.]          |
|                                            | HR              |
| Predictor                                  | CI 95%          |
| Intergenerational sociodemographic factors |                 |                 |                 |                 |                 |                 |                 |                 |                 |                 |                 |
| Birth order                                |                 |                 |                 |                 |                 |                 |                 |                 |                 |                 |                 |
| First born [Ref]                           | 1***            | 1***            | 1***            | 1***            | 1***            | 1***            | 1***            | 1***            | 1***            | 1**             | 1***            |
| Second born                                | 0.911           | 0.875           | 0.915           | 0.876           | 0.915           | 0.870           | 0.922           | 0.864           | 0.872           | 0.924           | 0.873           |
|                                            | [0.873 - 0.951] | [0.811 - 0.943] | [0.877 - 0.956] | [0.812 - 0.946] | [0.876 - 0.955] | [0.805 - 0.939] | [0.882 - 0.963] | [0.780 - 0.933] | [0.807 - 0.943] | [0.884 - 0.965] | [0.809 - 0.945] |
| Third born or higher                       | 0.998           | 1.072           | 0.965           | 1.036           | 0.951           | 1.020           | 0.959           | 0.997           | 1.007           | 0.957           | 1.000           |
|                                            | [0.940 - 1.061] | [0.981 - 1.173] | [0.908 - 1.027] | [0.945 - 1.136] | [0.893 - 1.014] | [0.927 - 1.121] | [0.900 - 1.022] | [0.906 - 1.097] | [0.914 - 1.109] | [0.898 - 1.020] | [0.908 - 1.102] |
| Mother's age at index woman's birth, years |                 |                 |                 |                 |                 |                 |                 |                 |                 |                 |                 |
| Less than or equal to 18                   | 1.220           | 1.204           | 1.128           | 1.036           | 1.126           | 1.035           | 1.122           | 1.054           | 1.058           | 1.118           | 1.046           |
|                                            | [1.054 - 1.413] | [0.845 - 1.715] | [0.973 - 1.307] | [0.742 - 1.498] | [0.972 - 1.305] | [0.724 - 1.478] | [0.968 - 1.300] | [0.737 - 1.506] | [0.740 - 1.512] | [0.964 - 1.296] | [0.732 - 1.496] |
| Between 19-35 [Ref]                        | 1**             | 1*              | 1*              | 1               | 1*              | 1               | 1*              | 1               | 1               | 1*              | 1               |
| Greater than 35                            | 1.066           | 1.048           | 1.065           | 1.049           | 1.047           | 1.024           | 1.047           | 1.009           | 1.008           | 1.036           | 1.000           |
|                                            | [0.997 - 1.139] | [0.935 - 1.175] | [0.996 - 1.139] | [0.934 - 1.179] | [0.978 - 1.119] | [0.911 - 1.151] | [0.979 - 1.121] | [0.897 - 1.134] | [0.896 - 1.133] | [0.969 - 1.109] | [0.890 - 1.125] |
| Mother's educational attainment            |                 |                 |                 |                 |                 |                 |                 |                 |                 |                 |                 |
| Primary                                    | 1.071           | 1.100           | 0.991           | 0.992           | 0.984           | 0.984           | 0.983           | 0.959           | 0.957           | 0.987           | 0.955           |
|                                            | [1.017 - 1.127] | [0.995 - 1.217] | [0.940 - 1.046] | [0.894 - 1.101] | [0.933 - 1.038] | [0.887 - 1.093] | [0.933 - 1.037] | [0.864 - 1.065] | [0.863 - 1.064] | [0.935 - 1.041] | [0.860 - 1.061] |
| Secondary [Ref]                            | 1***            | 1***            | 1               | 1*              | 1               | 1*              | 1               | 1               | 1               | 1               | 1               |
| University                                 | 0.941           | 0.884           | 0.975           | 0.937           | 0.982           | 0.945           | 0.983           | 0.982           | 0.984           | 0.981           | 0.981           |
|                                            | [0.904 - 0.981] | [0.821 - 0.952] | [0.932 - 1.020] | [0.864 - 1.017] | [0.938 - 1.028] | [0.871 - 1.026] | [0.942 - 1.031] | [0.904 - 1.066] | [0.905 - 1.068] | [0.937 - 1.027] | [0.903 - 1.065] |
| Father's educational attainment            |                 |                 |                 |                 |                 |                 |                 |                 |                 |                 |                 |
| Primary                                    | 1.042           | 1.022           | 1.011           | 0.983           | 1.004           | 0.979           | 1.005           | 0.964           | 0.965           | 1.018           | 0.975           |
|                                            | [0.997 - 1.090] | [0.940 - 1.111] | [0.966 - 1.059] | [0.903 - 1.071] | [0.959 - 1.051] | [0.890 - 1.066] | [0.964 - 1.056] | [0.885 - 1.049] | [0.886 - 1.050] | [0.972 - 1.066] | [0.895 - 1.061] |
| Secondary [Ref]                            | 1***            | 1***            | 1               | 1*              | 1               | 1*              | 1               | 1*              | 1*              | 1*              | 1*              |

|            |                 |                 |                 |                 |                 |                 |                 |                 |                 |                 |                 |
|------------|-----------------|-----------------|-----------------|-----------------|-----------------|-----------------|-----------------|-----------------|-----------------|-----------------|-----------------|
| University | 0.945           | 0.871           | 0.981           | 0.920           | 0.984           | 0.924           | 0.985           | 0.951           | 0.952           | 0.977           | 0.948           |
|            | [0.905 - 0.988] | [0.804 - 0.945] | [0.934 - 1.031] | [0.841 - 1.007] | [0.937 - 1.034] | [0.844 - 1.011] | [0.939 - 1.036] | [0.869 - 1.042] | [0.869 - 1.043] | [0.930 - 1.026] | [0.865 - 1.039] |

*Mother's country of birth*

|                           |                 |                 |                 |                 |                 |                 |                 |                 |                 |                 |                 |
|---------------------------|-----------------|-----------------|-----------------|-----------------|-----------------|-----------------|-----------------|-----------------|-----------------|-----------------|-----------------|
| Sweden [Ref]              | 1***            | 1***            | 1***            | 1***            | 1***            | 1***            | 1***            | 1***            | 1***            | 1***            | 1***            |
| Nordics, excluding Sweden | 1.062           | 1.035           | 1.017           | 0.994           | 1.017           | 0.992           | 1.018           | 0.975           | 0.974           | 0.988           | 0.949           |
|                           | [0.972 - 1.160] | [0.873 - 1.226] | [0.926 - 1.117] | [0.833 - 1.186] | [0.926 - 1.117] | [0.832 - 1.184] | [0.927 - 1.118] | [0.817 - 1.163] | [0.816 - 1.162] | [0.900 - 1.086] | [0.795 - 1.134] |
| Europe, North America and | 1.573           | 1.632           | 1.366           | 1.423           | 1.350           | 1.413           | 1.353           | 1.444           | 1.441           | 1.299           | 1.371           |
| Oceania                   | [1.446 - 1.712] | [1.399 - 1.903] | [1.235 - 1.511] | [1.184 - 1.711] | [1.220 - 1.495] | [1.175 - 1.700] | [1.223 - 1.497] | [1.200 - 1.737] | [1.198 - 1.734] | [1.173 - 1.438] | [1.138 - 1.652] |
| Africa                    | 1.796           | 2.115           | 1.291           | 1.490           | 1.274           | 1.475           | 1.271           | 1.542           | 1.541           | 1.211           | 1.471           |
|                           | [1.465 - 2.202] | [1.515 - 2.953] | [0.996 - 1.675] | [0.968 - 2.295] | [0.982 - 1.653] | [0.956 - 2.274] | [0.979 - 1.649] | [1.001 - 2.374] | [1.001 - 2.374] | [0.933 - 1.572] | [0.954 - 2.270] |
| Asia                      | 2.418           | 2.215           | 1.658           | 1.549           | 1.608           | 1.506           | 1.604           | 1.634           | 1.626           | 1.553           | 1.599           |
|                           | [2.140 - 2.732] | [1.785 - 2.750] | [1.402 - 1.960] | [1.156 - 2.075] | [1.358 - 1.903] | [1.123 - 2.019] | [1.355 - 1.898] | [1.218 - 2.193] | [1.211 - 2.183] | [1.313 - 1.838] | [1.191 - 2.146] |
| South America             | 1.960           | 1.648           | 1.579           | 1.143           | 1.564           | 1.134           | 1.566           | 1.159           | 1.263           | 1.480           | 1.100           |
|                           | [1.573 - 2.443] | [1.112 - 2.443] | [1.187 - 2.100] | [0.699 - 1.867] | [1.176 - 2.082] | [0.693 - 1.856] | [1.176 - 2.084] | [0.708 - 1.898] | [0.711 - 1.903] | [1.113 - 1.968] | [0.672 - 1.798] |

*Father's country of birth*

|                           |                 |                 |                 |                 |                 |                 |                 |                 |                 |                 |                 |
|---------------------------|-----------------|-----------------|-----------------|-----------------|-----------------|-----------------|-----------------|-----------------|-----------------|-----------------|-----------------|
| Sweden [Ref]              | 1***            | 1***            | 1***            | 1*              | 1***            | 1*              | 1***            | 1*              | 1*              | 1***            | 1*              |
| Nordics, excluding Sweden | 1.091           | 1.070           | 1.060           | 1.033           | 1.055           | 1.020           | 1.055           | 1.008           | 1.010           | 1.047           | 1.005           |
|                           | [0.991 - 1.201] | [0.892 - 1.283] | [0.958 - 1.175] | [0.855 - 1.249] | [0.953 - 1.168] | [0.843 - 1.232] | [0.952 - 1.168] | [0.834 - 1.219] | [0.834 - 1.218] | [0.945 - 1.160] | [0.831 - 1.215] |
| Europe, North America and | 1.444           | 1.445           | 1.196           | 1.142           | 1.187           | 1.129           | 1.186           | 1.140           | 1.137           | 1.134           | 1.091           |
| Oceania                   | [1.334 - 1.563] | [1.245 - 1.677] | [1.087 - 1.315] | [0.954 - 1.366] | [1.079 - 1.306] | [0.943 - 1.353] | [1.078 - 1.304] | [0.952 - 1.366] | [0.949 - 1.362] | [1.030 - 1.248] | [0.910 - 1.310] |
| Africa                    | 1.677           | 1.809           | 1.362           | 1.306           | 1.335           | 1.268           | 1.333           | 1.257           | 1.251           | 1.237           | 1.144           |
|                           | [1.422 - 1.978] | [1.364 - 2.340] | [1.103 - 1.682] | [0.905 - 1.884] | [1.081 - 1.649] | [0.878 - 1.830] | [1.079 - 1.647] | [0.872 - 1.812] | [0.867 - 1.804] | [1.001 - 1.528] | [0.792 - 1.652] |
| Asia                      | 2.374           | 2.199           | 1.624           | 1.508           | 1.594           | 1.466           | 1.593           | 1.440           | 1.435           | 1.516           | 1.366           |
|                           | [2.109 - 2.672] | [1.786 - 2.707] | [1.379 - 1.912] | [1.135 - 2.005] | [1.353 - 1.879] | [1.102 - 1.950] | [1.352 - 1.878] | [1.082 - 1.915] | [1.079 - 1.910] | [1.287 - 1.787] | [1.027 - 1.818] |
| South America             | 1.762           | 1.822           | 1.313           | 1.584           | 1.306           | 1.552           | 1.306           | 1.570           | 1.562           | 1.236           | 1.518           |
|                           | [1.431 - 2.169] | [1.305 - 2.542] | [1.003 - 1.719] | [1.044 - 2.403] | [0.997 - 1.711] | [1.022 - 2.359] | [0.997 - 1.711] | [1.033 - 2.386] | [1.029 - 2.373] | [0.944 - 1.618] | [1.000 - 2.306] |

*Mother's lifetime earning rank*

|                |                 |                 |                 |                 |                 |                 |                 |                 |                 |                 |                 |
|----------------|-----------------|-----------------|-----------------|-----------------|-----------------|-----------------|-----------------|-----------------|-----------------|-----------------|-----------------|
| First quintile | 1.128           | 1.237           | 1.035           | 1.096           | 1.023           | 1.079           | 1.024           | 1.079           | 1.081           | 1.033           | 1.076           |
|                | [1.057 - 1.204] | [1.101 - 1.390] | [0.967 - 1.107] | [0.970 - 1.239] | [0.956 - 1.095] | [0.954 - 1.219] | [0.957 - 1.096] | [0.955 - 1.220] | [0.956 - 1.222] | [0.966 - 1.107] | [0.951 - 1.217] |



|                  |                          |                          |                          |                          |                          |                          |                          |                          |                          |                          |                          |
|------------------|--------------------------|--------------------------|--------------------------|--------------------------|--------------------------|--------------------------|--------------------------|--------------------------|--------------------------|--------------------------|--------------------------|
| No sister        | 1.119<br>[1.077 - 1.170] | 1.126<br>[1.051 - 1.205] | 1.114<br>[1.072 - 1.157] | 1.120<br>[1.046 - 1.199] | 1.103<br>[1.060 - 1.147] | 1.119<br>[1.043 - 1.201] | 1.103<br>[1.061 - 1.148] | 1.108<br>[1.033 - 1.190] | 1.108<br>[1.032 - 1.190] | 1.100<br>[1.057 - 1.144] | 1.105<br>[1.030 - 1.186] |
| Sister with PCOS | 5.210<br>[4.708 - 5.765] | 5.506<br>[4.610 - 6.576] | 5.148<br>[4.652 - 5.697] | 5.377<br>[4.501 - 6.424] | 4.970<br>[4.490 - 5.502] | 5.143<br>[4.301 - 6.149] | 4.957<br>[4.479 - 5.487] | 5.003<br>[4.183 - 5.983] | 5.002<br>[4.183 - 5.982] | 4.739<br>[4.281 - 5.245] | 4.786<br>[4.002 - 5.724] |

### Early-life factors - before birth

#### *Mother's smoking in early pregnancy<sup>a</sup>*

|                   |   |                          |   |                          |   |                          |                          |   |                          |
|-------------------|---|--------------------------|---|--------------------------|---|--------------------------|--------------------------|---|--------------------------|
| Not smoking [Ref] | - | 1***                     | - | 1***                     | - | 1***                     | 1***                     | - | 1***                     |
| Moderate smoker   | - | 1.170<br>[1.073 - 1.276] | - | 1.172<br>[1.075 - 1.279] | - | 1.168<br>[1.069 - 1.277] | 1.162<br>[1.062 - 1.270] | - | 1.146<br>[1.047 - 1.253] |
| Heavy smoker      | - | 1.301<br>[1.176 - 1.440] | - | 1.282<br>[1.158 - 1.419] | - | 1.260<br>[1.135 - 1.399] | 1.250<br>[1.125 - 1.390] | - | 1.221<br>[1.098 - 1.358] |

#### *Weight gain during pregnancy<sup>a</sup>*

|                   |   |                          |   |                          |   |                          |                          |   |                          |
|-------------------|---|--------------------------|---|--------------------------|---|--------------------------|--------------------------|---|--------------------------|
| Inadequate        | - | 1.016<br>[0.932 - 1.107] | - | 1.046<br>[0.959 - 1.140] | - | 1.041<br>[0.954 - 1.135] | 1.034<br>[0.947 - 1.128] | - | 1.037<br>[0.950 - 1.132] |
| Appropriate [Ref] | - | 1**                      | - | 1*                       | - | 1*                       | 1*                       | - | 1*                       |
| Excessive         | - | 1.139<br>[1.053 - 1.231] | - | 1.057<br>[0.976 - 1.146] | - | 1.047<br>[0.966 - 1.134] | 1.051<br>[0.969 - 1.139] | - | 1.047<br>[0.966 - 1.136] |

#### *Mother's BMI at the beginning of pregnancy<sup>a</sup>*

|              |   |                          |   |                          |   |                          |                          |   |                          |
|--------------|---|--------------------------|---|--------------------------|---|--------------------------|--------------------------|---|--------------------------|
| Underweight  | - | 0.904<br>[0.788 - 1.037] | - | 0.893<br>[0.777 - 1.025] | - | 0.878<br>[0.765 - 1.009] | 0.873<br>[0.760 - 1.003] | - | 0.866<br>[0.754 - 0.995] |
| Normal [Ref] | - | 1***                     | - | 1***                     | - | 1***                     | 1***                     | - | 1***                     |
| Overweight   | - | 1.488<br>[1.361 - 1.628] | - | 1.470<br>[1.340 - 1.612] | - | 1.397<br>[1.271 - 1.494] | 1.394<br>[1.268 - 1.532] | - | 1.396<br>[1.270 - 1.534] |
| Obese        | - | 1.902<br>[1.617 - 2.361] | - | 1.871<br>[1.590 - 2.202] | - | 1.698<br>[1.438 - 2.005] | 1.694<br>[1.434 - 2.001] | - | 1.681<br>[1.423 - 1.986] |

### Early-life factors - outcomes

#### *Birth weight, grams<sup>b</sup>*

---

|                              |                 |                 |                 |                 |                 |                 |                 |                 |
|------------------------------|-----------------|-----------------|-----------------|-----------------|-----------------|-----------------|-----------------|-----------------|
| Less than 2 500              | 1.095           | 0.966           | 1.092           | 0.851           | 1.072           | 0.821           | 1.071           | 0.822           |
|                              | [0.989 - 1.213] | [0.782 - 1.193] | [0.970 - 1.230] | [0.669 - 1.082] | [0.952 - 1.207] | [0.760 - 1.003] | [0.951 - 1.206] | [0.647 - 1.045] |
| 2 500 – 2 999                | 1.129           | 1.102           | 1.130           | 1.073           | 1.109           | 1.051           | 1.106           | 1.049           |
|                              | [1.066 - 1.195] | [0.995 - 1.225] | [1.066 - 1.197] | [0.963 - 1.195] | [1.046 - 1.176] | [0.942 - 1.172] | [1.043 - 1.172] | [0.941 - 1.170] |
| 3 000 – 3 499 [Ref]          | <b>1***</b>     | <b>1*</b>       | <b>1***</b>     | <b>1*</b>       | <b>1**</b>      | <b>1*</b>       | <b>1**</b>      | <b>1*</b>       |
| 3 500 – 3 999                | 0.992           | 0.932           | 0.983           | 0.932           | 0.996           | 0.940           | 1.001           | 0.944           |
|                              | [0.949 - 1.037] | [0.860 - 1.010] | [0.940 - 1.027] | [0.860 - 1.011] | [0.953 - 1.041] | [0.866 - 1.020] | [0.957 - 1.046] | [0.869 - 1.025] |
| 4 000 – 4 499                | 1.056           | 0.984           | 1.034           | 0.977           | 1.053           | 0.967           | 1.063           | 0.972           |
|                              | [0.994 - 1.122] | [0.880 - 1.100] | [0.972 - 1.099] | [0.873 - 1.093] | [0.990 - 1.120] | [0.862 - 1.086] | [0.999 - 1.131] | [0.866 - 1.092] |
| Fetal macrosomia, over 4 500 | 1.071           | 1.182           | 1.033           | 1.162           | 1.040           | 1.105           | 1.056           | 1.125           |
|                              | [0.942 - 1.218] | [0.950 - 1.470] | [0.908 - 1.175] | [0.933 - 1.447] | [0.914 - 1.183] | [0.884 - 1.382] | [0.928 - 1.202] | [0.900 - 1.407] |

### One-minute Apgar

|                         |                 |                 |                 |                 |                 |                 |                 |                 |
|-------------------------|-----------------|-----------------|-----------------|-----------------|-----------------|-----------------|-----------------|-----------------|
| Less than or equal to 7 | 1.184           | 1.285           | 1.163           | 1.263           | 1.35            | 1.189           | 1.122           | 1.207           |
|                         | [1.086 - 1.291] | [1.086 - 1.521] | [1.065 - 1.269] | [1.066 - 1.497] | [1.039 - 1.239] | [1.003 - 1.411] | [1.027 - 1.225] | [1.016 - 1.433] |
| 8                       | 1.132           | 1.067           | 1.119           | 1.055           | 1.102           | 1.017           | 1.093           | 1.036           |
|                         | [1.045 - 1.227] | [0.912 - 1.249] | [1.032 - 1.213] | [0.901 - 1.235] | [1.017 - 1.195] | [0.868 - 1.192] | [1.008 - 1.192] | [0.883 - 1.215] |
| 9                       | 1.127           | 1.180           | 1.124           | 1.176           | 1.121           | 1.162           | 1.124           | 1.200           |
|                         | [1.068 - 1.190] | [1.059 - 1.315] | [1.064 - 1.187] | [1.055 - 1.310] | [1.062 - 1.184] | [1.042 - 1.295] | [1.042 - 1.295] | [1.073 - 1.341] |
| 10 [Ref]                | <b>1***</b>     | <b>1**</b>      | <b>1***</b>     | <b>1**</b>      | <b>1***</b>     | <b>1**</b>      | <b>1**</b>      | <b>1**</b>      |

### Gestational age, weeks

|                                 |                 |                 |                 |                 |                 |                 |                 |                 |
|---------------------------------|-----------------|-----------------|-----------------|-----------------|-----------------|-----------------|-----------------|-----------------|
| Extremely preterm, less than    | 0.895           | 0.820           | 0.820           | 0.856           | 0.797           | 0.837           | 0.797           | 0.846           |
| 28                              | [0.427 - 1.879] | [0.115 – 5.822] | [0.388 - 1.732] | [0.120 – 6.129] | [0.377 - 1.684] | [0.117 - 5.994] | [0.377 - 1.683] | [0.118 – 6.058] |
| Very preterm, between 28-32     | 0.991           | 1.027           | 0.904           | 1.124           | 0.893           | 1.138           | 0.892           | 1.153           |
|                                 | [0.769 - 1.277] | [0.596 - 1.771] | [0.688 - 1.188] | [0.631 – 2.004] | [0.680 - 1.172] | [0.638 – 2.027] | [0.679 - 1.171] | [0.647 – 2.052] |
| Moderate to late preterm, 33-36 | 1.126           | 1.290           | 1.044           | 1.287           | 1.033           | 1.274           | 1.032           | 1.273           |
|                                 | [1.023 - 1.239] | [1.096 - 1.517] | [0.939 - 1.162] | [1.075 - 1.541] | [0.928 - 1.150] | [1.065 - 1.524] | [0.928 - 1.148] | [1.064 - 1.522] |
| Full term, 37 -41 [Ref]         | <b>1***</b>     | <b>1*</b>       | <b>1***</b>     | <b>1*</b>       | <b>1***</b>     | <b>1*</b>       | <b>1***</b>     | <b>1*</b>       |
| Post-term, 42 or over           | 1.191           | 1.125           | 1.199           | 1.128           | 1.195           | 1.110           | 1.187           | 1.100           |
|                                 | [1.126 - 1.260] | [0.983 - 1.288] | [1.133 - 1.269] | [0.984 - 1.293] | [1.129 - 1.265] | [0.968 - 1.273] | [1.121 - 1.257] | [0.959 - 1.261] |

## Individual adult life factors – index woman

### Educational attainment

|                        |                          |                          |                          |                          |                          |                          |
|------------------------|--------------------------|--------------------------|--------------------------|--------------------------|--------------------------|--------------------------|
| Under primary          | 1.148<br>[0.875 - 1.506] | 1.148<br>[0.754 - 1.747] | 1.144<br>[0.872 - 1.500] | 1.139<br>[0.749 - 1.733] | 1.109<br>[0.847 - 1.452] | 1.063<br>[0.701 - 1.613] |
| Primary school         | 1.288<br>[1.201 - 1.382] | 1.368<br>[1.211 - 1.545] | 1.276<br>[1.190 - 1.369] | 1.349<br>[1.195 - 1.523] | 1.221<br>[1.137 - 1.310] | 1.243<br>[1.100 - 1.405] |
| Secondary school [Ref] | <b>1***</b>              | <b>1***</b>              | <b>1***</b>              | <b>1***</b>              | <b>1***</b>              | <b>1**</b>               |
| University             | 1.033<br>[0.989 - 1.079] | 0.986<br>[0.905 - 1.074] | 1.014<br>[0.970 - 1.059] | 0.982<br>[0.901 - 1.071] | 1.063<br>[1.015 - 1.112] | 1.051<br>[0.962 - 1.149] |

### Civil status

|                                          |                          |                          |                          |                          |                          |                          |
|------------------------------------------|--------------------------|--------------------------|--------------------------|--------------------------|--------------------------|--------------------------|
| Not married, not registered relationship | 1.261<br>[1.192 - 1.333] | 1.596<br>[1.388 - 1.835] | 1.274<br>[1.205 - 1.347] | 1.587<br>[1.380 - 1.824] | 1.242<br>[1.175 - 1.313] | 1.459<br>[1.268 - 1.678] |
| Married, registered relationship [Ref]   | <b>1***</b>              | <b>1***</b>              | <b>1***</b>              | <b>1***</b>              | <b>1***</b>              | <b>1***</b>              |

Abbreviations: BMI, body mass index; CI, confidence interval; DM, diabetes mellitus; HR, hazard ratio; PCOS, polycystic ovary syndrome; Ref, reference; Res, restricted.

Full: analyses were done on the full sample; women born between 1973 and 1995 [n = 977 637].

Restricted.: analyses were done on the restricted sample; women born between 1982 and 1995 [n = 302 638].

<sup>a</sup>Available for a subgroup of women born between 1982 and 1995 [n = 302 638].

<sup>b</sup>No significant nonlinearity was detected when testing for birth weight and its quadratic term.

Model 1: Minimally adjusted analyses that only adjust for the given variable and birth year.

Model 2: Further adjusted models additionally adjust for variables under the same category, for instance Intergenerational biological variables: OD in mother, DM in mother, OD in sister, with additional adjustment for birth year.

Model 3: Model includes all Intergenerational sociodemographic and biological variables with additional adjustment for birth year.

Model 4: Model includes all Intergenerational sociodemographic and biological variables, and Early-life factors with additional adjustment for birth year.

Model 5: Model includes all Intergenerational sociodemographic and biological variables, Early-life factors and Individual adult life factors with additional adjustment for birth year and counties.

\*\*\*p<0.001

\*\*p<0.01

\*p<0.5

**Table S3.** Associations of social and biological characteristics with rate of polycystic ovary syndrome with age restriction among Swedish women born between 1973-1995

|                                                   | Sensitivity analysis:<br>Age <20yrs<br>n = 644 692 | Sensitivity analysis:<br>Age <25yrs<br>n = 803 948 | Full Model:<br>Follow-up 1973-1995<br>n = 977 637 |
|---------------------------------------------------|----------------------------------------------------|----------------------------------------------------|---------------------------------------------------|
| Predictor                                         | HR<br>[CI 95%]                                     | HR<br>[CI 95%]                                     | HR<br>[CI 95%]                                    |
| Intergenerational sociodemographic variables      |                                                    |                                                    |                                                   |
| <i>Birth order</i>                                |                                                    |                                                    |                                                   |
| First born [Ref]                                  | 1***                                               | 1***                                               | 1**                                               |
| Second born                                       | 0.892<br>[0.842 - 0.944]                           | 0.908<br>[0.867 - 0.951]                           | 0.924<br>[0.884 - 0.965]                          |
| Third born or higher                              | 0.938<br>[0.873 - 1.008]                           | 0.947<br>[0.887 - 1.010]                           | 0.957<br>[0.898 - 1.020]                          |
| <i>Mother's age at index woman's birth, years</i> |                                                    |                                                    |                                                   |
| Less than or equal to 18                          | 1.091<br>[0.849 - 1.402]                           | 1.084<br>[0.894 - 1.313]                           | 1.118<br>[0.964 - 1.296]                          |
| Between 19-35 [Ref]                               | 1*                                                 | 1*                                                 | 1*                                                |
| Greater than 35                                   | 1.053<br>[0.969 - 1.144]                           | 1.040<br>[0.967 - 1.118]                           | 1.036<br>[0.969 - 1.109]                          |
| <i>Mother's educational attainment</i>            |                                                    |                                                    |                                                   |
| Primary                                           | 0.984<br>[0.911 - 1.063]                           | 0.978<br>[0.918 - 1.042]                           | 0.987<br>[0.935 - 1.041]                          |
| Secondary [Ref]                                   | 1*                                                 | 1                                                  | 1                                                 |
| University                                        | 0.953<br>[0.897 - 1.012]                           | 0.976<br>[0.927 - 1.026]                           | 0.981<br>[0.937 - 1.027]                          |
| <i>Father's educational attainment</i>            |                                                    |                                                    |                                                   |
| Primary                                           | 1.020                                              | 1.036                                              | 1.018                                             |



---

|                                   |                 |                 |                 |
|-----------------------------------|-----------------|-----------------|-----------------|
|                                   | [0.957 - 1.086] | [0.983 - 1.092] | [0.972 - 1.066] |
| Secondary <b>[Ref]</b>            | <b>1</b>        | <b>1*</b>       | <b>1*</b>       |
| University                        | 0.978           | 0.991           | 0.977           |
|                                   | [0.916 - 1.045] | [0.938 - 1.047] | [0.930 - 1.026] |
| <i>Mother's country of birth</i>  |                 |                 |                 |
| Sweden <b>[Ref]</b>               | <b>1***</b>     | <b>1***</b>     | <b>1***</b>     |
| Nordics, excluding Sweden         | 0.981           | 0.959           | 0.988           |
|                                   | [0.861 - 1.117] | [0.860 - 1.068] | [0.900 - 1.086] |
| Europe, North America and Oceania | 1.340           | 1.329           | 1.299           |
|                                   | [1.175 - 1.529] | [1.188 - 1.487] | [1.173 - 1.438] |
| Africa                            | 1.295           | 1.267           | 1.211           |
|                                   | [0.969 - 1.731] | [0.967 - 1.661] | [0.933 - 1.572] |
| Asia                              | 1.527           | 1.541           | 1.553           |
|                                   | [1.262 - 1.848] | [1.294 - 1.836] | [1.313 - 1.838] |
| South America                     | 1.406           | 1.368           | 1.480           |
|                                   | [1.016 - 1.947] | [1.012 - 1.848] | [1.113 - 1.968] |
| <i>Father's country of birth</i>  |                 |                 |                 |
| Sweden <b>[Ref]</b>               | <b>1***</b>     | <b>1***</b>     | <b>1***</b>     |
| Nordics, excluding Sweden         | 1.037           | 1.052           | 1.047           |
|                                   | [0.901 - 1.192] | [0.936 - 1.182] | [0.945 - 1.160] |
| Europe, North America and Oceania | 1.188           | 1.153           | 1.134           |
|                                   | [1.046 - 1.349] | [1.035 - 1.284] | [1.030 - 1.248] |
| Africa                            | 1.169           | 1.179           | 1.237           |
|                                   | [0.907 - 1.507] | [0.939 - 1.480] | [1.001 - 1.528] |
| Asia                              | 1.547           | 1.554           | 1.516           |
|                                   | [1.283 - 1.866] | [1.310 - 1.844] | [1.287 - 1.787] |
| South America                     | 1.254           | 1.281           | 1.236           |
|                                   | [0.924 - 1.702] | [0.969 - 1.695] | [0.944 - 1.618] |

---

*Mother's lifetime earning rank*

|                      |                          |                          |                          |
|----------------------|--------------------------|--------------------------|--------------------------|
| First quintile       | 1.054<br>[0.962 - 1.156] | 1.027<br>[0.951 - 1.110] | 1.033<br>[0.966 - 1.107] |
| Second quintile      | 1.110<br>[1.040 - 1.185] | 1.080<br>[1.022 - 1.141] | 1.068<br>[1.018 - 1.122] |
| Third quintile [Ref] | <b>1***</b>              | <b>1**</b>               | <b>1**</b>               |
| Fourth quintile      | 0.969<br>[0.903 - 1.039] | 0.974<br>[0.919 - 1.033] | 0.991<br>[0.941 - 1.044] |
| Fifth quintile       | 0.941<br>[0.855 - 1.035] | 0.962<br>[0.890 - 1.040] | 0.953<br>[0.889 - 1.022] |

*Father's lifetime earning rank*

|                      |                          |                          |                          |
|----------------------|--------------------------|--------------------------|--------------------------|
| First quintile       | 1.061<br>[0.974 - 1.156] | 1.015<br>[0.944 - 1.093] | 1.033<br>[0.968 - 1.102] |
| Second quintile      | 0.988<br>[0.923 - 1.057] | 0.976<br>[0.922 - 1.033] | 0.979<br>[0.931 - 1.030] |
| Third quintile [Ref] | <b>1*</b>                | <b>1*</b>                | <b>1**</b>               |
| Fourth quintile      | 0.946<br>[0.880 - 1.018] | 0.933<br>[0.879 - 0.991] | 0.922<br>[0.874 - 0.973] |
| Fifth quintile       | 0.902<br>[0.823 - 0.988] | 0.904<br>[0.839 - 0.974] | 0.914<br>[0.856 - 0.976] |

**Intergenerational biological variables**

*PCOS in mother*

|          |                          |                          |                          |
|----------|--------------------------|--------------------------|--------------------------|
| No [Ref] | <b>1***</b>              | <b>1***</b>              | <b>1***</b>              |
| Yes      | 3.247<br>[2.578 - 4.089] | 2.900<br>[2.344 - 3.587] | 2.612<br>[2.132 - 3.320] |

*DM in mother*

|          |             |             |             |
|----------|-------------|-------------|-------------|
| No [Ref] | <b>1***</b> | <b>1***</b> | <b>1***</b> |
|----------|-------------|-------------|-------------|

|                                      |                                  |                          |                          |                          |
|--------------------------------------|----------------------------------|--------------------------|--------------------------|--------------------------|
|                                      | Yes                              | 1.400<br>[1.241 - 1.578] | 1.400<br>[1.271 - 1.541] | 1.377<br>[1.270 - 1.494] |
| <i>PCOS in sister</i>                |                                  |                          |                          |                          |
|                                      | Sister without PCOS <b>[Ref]</b> | <b>1***</b>              | <b>1***</b>              | <b>1***</b>              |
|                                      | No sister                        | 1.133<br>[1.075 - 1.194] | 1.100<br>[1.053 - 1.149] | 1.100<br>[1.057 - 1.144] |
|                                      | Sister with PCOS                 | 5.270<br>[4.633 - 5.995] | 4.687<br>[4.194 - 5.238] | 4.739<br>[4.281 - 5.245] |
| <b>Early-life factors - outcomes</b> |                                  |                          |                          |                          |
| <i>Birth weight, grams</i>           |                                  |                          |                          |                          |
|                                      | Less than 2 500                  | 0.976<br>[0.831 - 1.147] | 1.019<br>[0.890 - 1.168] | 1.071<br>[0.951 - 1.206] |
|                                      | 2 500 – 2 999                    | 1.058<br>[0.977 - 1.145] | 1.071<br>[1.002 - 1.145] | 1.106<br>[1.043 - 1.172] |
|                                      | 3 000 – 3 499 <b>[Ref]</b>       | <b>1*</b>                | <b>1*</b>                | <b>1**</b>               |
|                                      | 3 500 – 3 999                    | 0.976<br>[0.919 - 1.037] | 1.001<br>[0.953 - 1.053] | 1.001<br>[0.957 - 1.046] |
|                                      | 4 000 – 4 499                    | 1.037<br>[0.954 - 1.128] | 1.051<br>[0.980 - 1.126] | 1.063<br>[0.999 - 1.131] |
|                                      | Fetal macrosomia, over 4 500     | 1.153<br>[0.977 - 1.362] | 1.063<br>[0.920 - 1.228] | 1.056<br>[0.928 - 1.202] |
| <i>One-minute Apgar</i>              |                                  |                          |                          |                          |
|                                      | Less than or equal to 7          | 1.203<br>[1.057 - 1.368] | 1.166<br>[1.045 - 1.301] | 1.122<br>[1.027 - 1.225] |
|                                      | 8                                | 1.133<br>[1.007 - 1.276] | 1.128<br>[1.020 - 1.248] | 1.093<br>[1.008 - 1.192] |
|                                      | 9                                | 1.183                    | 1.158                    | 1.124                    |

|                                 |                 |                 |                 |
|---------------------------------|-----------------|-----------------|-----------------|
|                                 | [1.085 - 1.290] | [1.075 - 1.248] | [1.042 - 1.295] |
| 10 [Ref]                        | <b>1***</b>     | <b>1***</b>     | <b>1**</b>      |
| <i>Gestational age, weeks</i>   |                 |                 |                 |
| Extremely preterm, less than 28 | 0.642           | 0.791           | 0.797           |
|                                 | [0.238 - 1.731] | [0.352 - 1.778] | [0.377 - 1.683] |
| Very preterm, between 28-32     | 1.018           | 0.940           | 0.892           |
|                                 | [0.724 - 1.432] | [0.695 - 1.270] | [0.679 - 1.171] |
| Moderate to late preterm, 33-36 | 1.106           | 1.079           | 1.032           |
|                                 | [0.971 - 1.260] | [0.962 - 1.212] | [0.928 - 1.148] |
| Full term, 37 -41 [Ref]         | <b>1*</b>       | <b>1**</b>      | <b>1***</b>     |
| Post-term, 42 or over           | 1.037           | 1.126           | 1.187           |
|                                 | [0.935 - 1.151] | [1.048 - 1.209] | [1.121 - 1.257] |

#### Individual adult life factors -index woman

##### *Educational attainment*

|                        |                 |                 |                 |
|------------------------|-----------------|-----------------|-----------------|
| Under primary          | 1.079           | 1.095           | 1.109           |
|                        | [0.820 - 1.421] | [0.834 - 1.437] | [0.847 - 1.452] |
| Primary school         | 1.189           | 1.205           | 1.221           |
|                        | [1.087 - 1.301] | [1.114 - 1.304] | [1.137 - 1.310] |
| Secondary school [Ref] | <b>1**</b>      | <b>1***</b>     | <b>1***</b>     |
| University             | 1.010           | 1.033           | 1.063           |
|                        | [0.943 - 1.082] | [0.979 - 1.090] | [1.015 - 1.112] |

##### *Civil status*

|                                          |                 |                 |                 |
|------------------------------------------|-----------------|-----------------|-----------------|
| Not married, not registered relationship | 1.451           | 1.340           | 1.242           |
|                                          | [1.300 - 1.619] | [1.247 - 1.440] | [1.175 - 1.313] |
| Married, registered relationship [Ref]   | <b>1***</b>     | <b>1***</b>     | <b>1***</b>     |

\*\*\*p<0.001

\*\*p<0.01

---

\*p<0.5

**Figure S1.** Flow diagram of the study sample

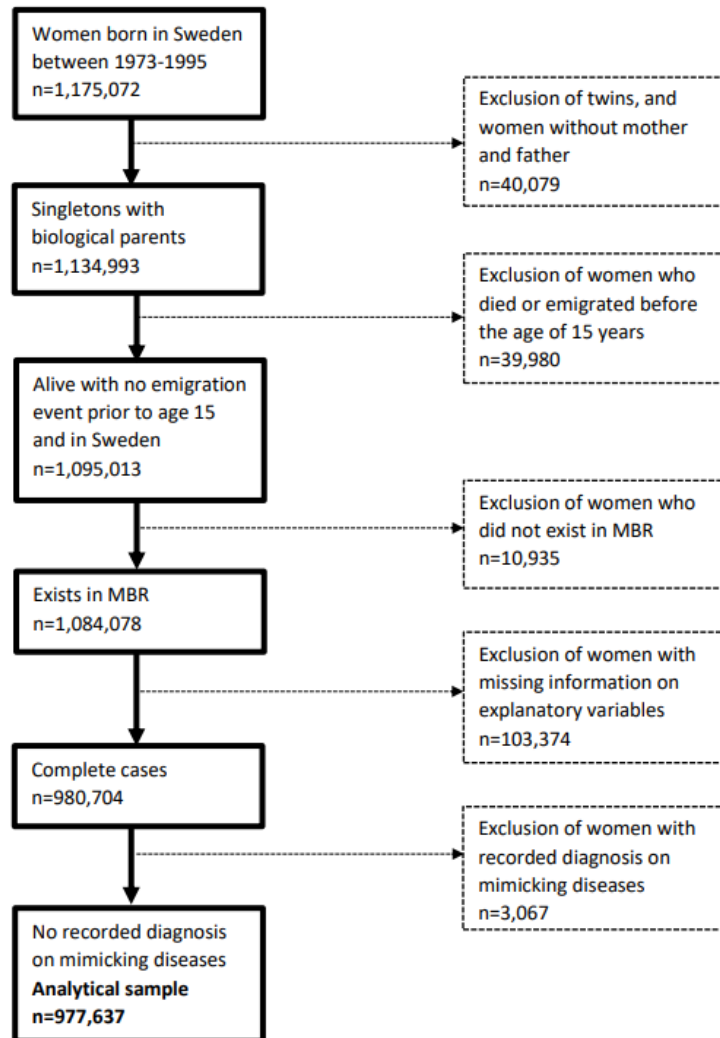

**Figure S2.** Conceptual framework depicting explanatory variables that capture pre-, peri-, and postnatal context of polycystic ovary syndrome

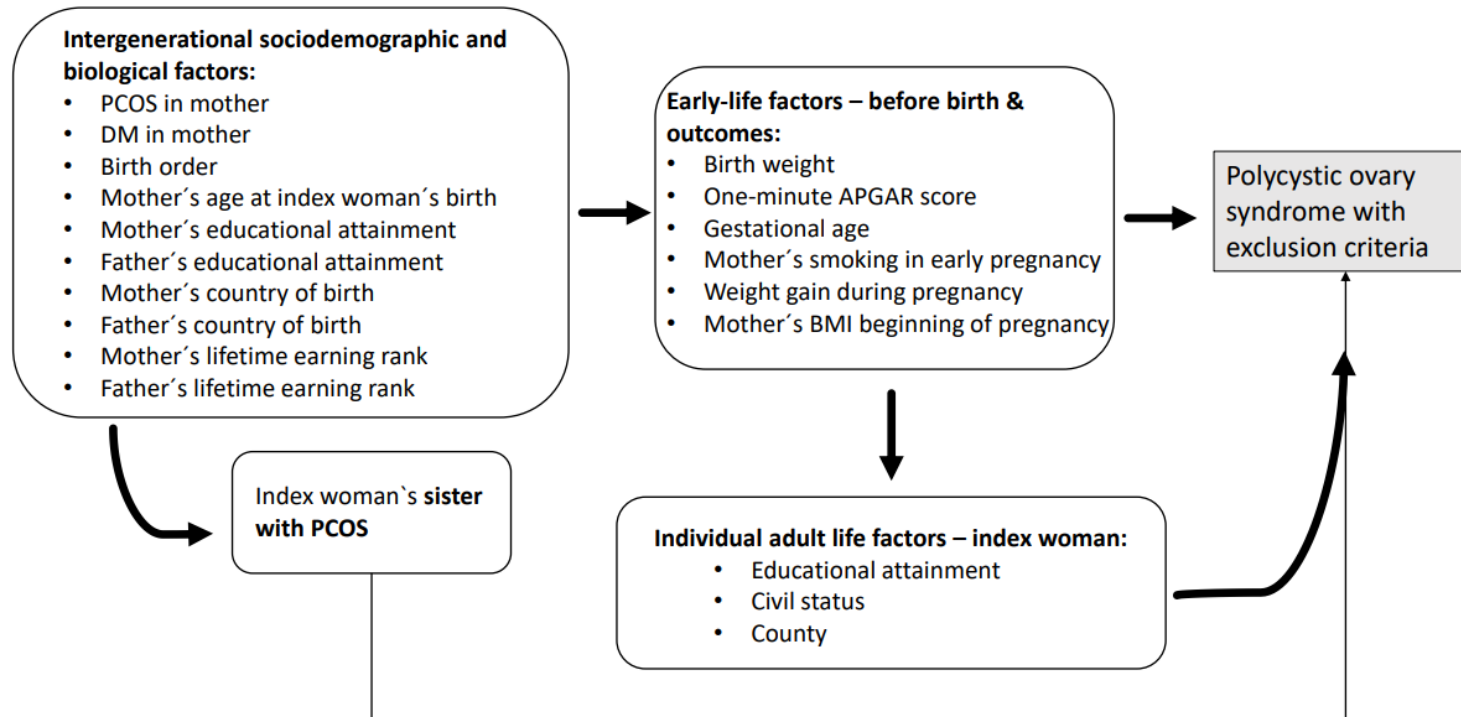

Supplement: s1 [file s1]
